# Supplementary material
Source: PubMed Central journal article supplement (PMC3433608)

## Supporting Material

### Structural transformation and physical properties of a hydrogel forming peptide studied by NMR, TEM and dynamic rheometer

Hongzhou Huang<sup>1</sup>, Alvaro I. Herrera<sup>2</sup>, Zhiping Luo<sup>3</sup>, Om Prakash<sup>2\*</sup>, Xiuzhi S. Sun<sup>1\*</sup>

<sup>1</sup>Bio-Materials and Technology Laboratory, Department of Grain Science and Industry; <sup>2</sup>Biomolecular NMR Laboratory, Department of Biochemistry, Kansas State University, Manhattan, KS 66506; <sup>3</sup>Microscopy and Imaging Center, Materials Science and Engineering Program, Texas A&M University, College Station, TX 77843

E-mails: [xss@k-state.edu](mailto:xss@k-state.edu); [omp@k-state.edu](mailto:omp@k-state.edu)

**Fig. S1 Dynamic Light Scatter (DLS) data of hydrodynamic diameters of h9e peptide amorphous morphologies in 100% (A and C) and 90% (B and D) DMSO with 0 (A and B) and 30 (C and D) mM Ca<sup>2+</sup>.**

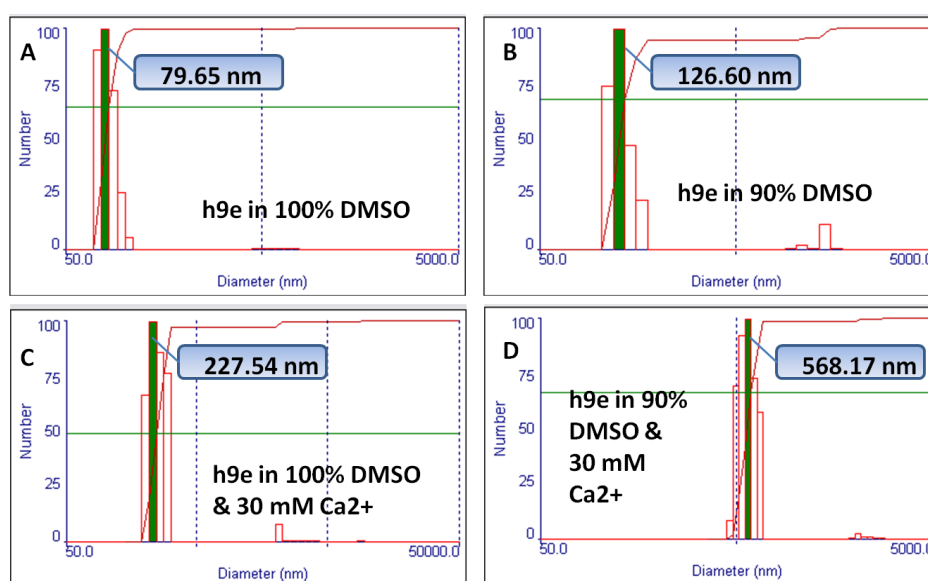



**Fig. S3** Frequency sweep test of 3 mM h9e peptide in 90%, 70% and 50% DMSO solution after 48 h hydrogel stabilization.

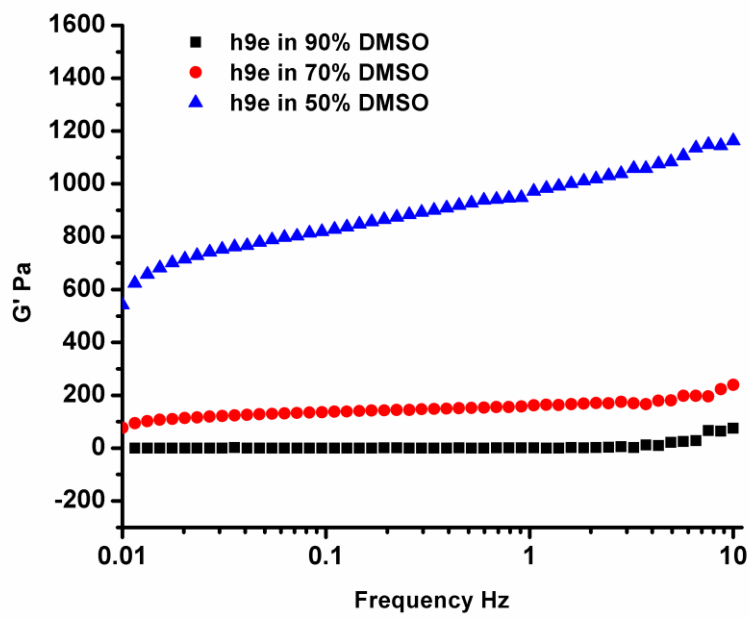

**Fig. S4** Frequency sweep test of 3 mM h9e peptide in 70% DMSO with 0, 3 and 30 mM  $\text{Ca}^{2+}$  after 12 h hydrogel stabilization.

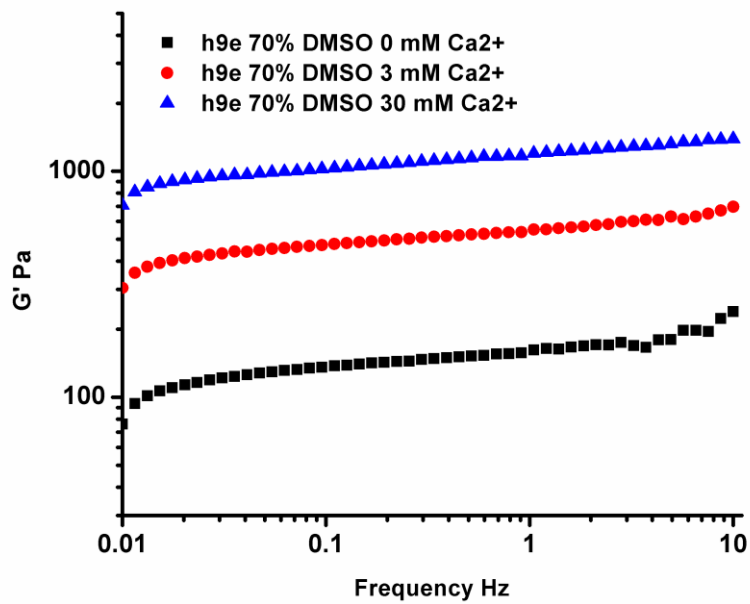

**Fig. S5 Amplitude sweep test of 3 mM h9e hydrogel in 70% DMSO with 0, 3 and 30 mM Ca<sup>2+</sup> under the range of shear strain from 0.01% to 500 %. The enlarged window shows the linear viscoelastic regime of h9e hydrogel in a linear scale.**

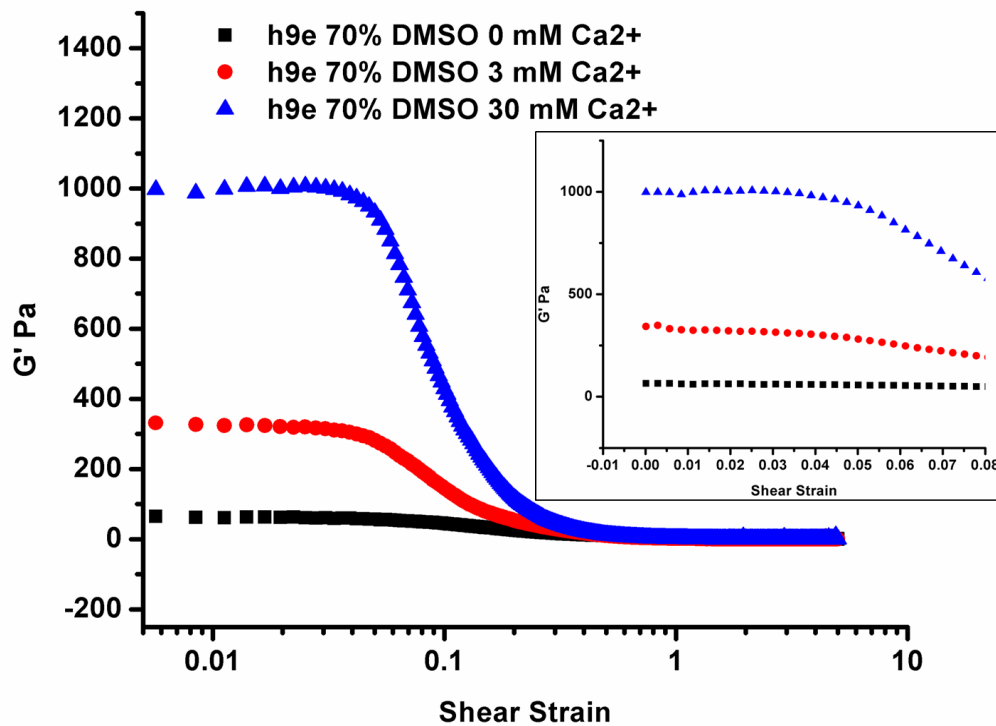

Supplement: mmc1.pdf [file mmc1.pdf]
